# Supplementary material
Source: ML conference proceedings conference paper supplement (https://openaccess.thecvf.com/content/WACV2021/html/Dabral_Exploration_of_Spatial_WACV_2021_paper.html)
Supplement: Supplementary file 2 [file Dabral_Exploration_of_Spatial_WACV_2021_supplemental.zip]

Archive with 3 entries (2 files):
- 0438-supp/
- 0438-supp/Supplementary_material_438.mp4
- 0438-supp/Supplementary_material_438.pdf
